# Supplementary material for: Insights into the metagenomic and metabolomic compositions of the bacterial communities in Thai traditional fermented foods as well as the relationships between food nutrition and food microbiomes
Source: PeerJ. 2025 Jun 27;13:e19606. doi: 10.7717/peerj.19606 (PMC12208106; doi:10.7717/peerj.19606)
Supplement: Supplemental Information 5 [file peerj-13-19606-s005.xlsx]

## Sheet: nutrition
	sample	replicate	Calories (Kcal/100g)	Carbohydrate (g/100g)	Fat (g/100g)	Moisture (g/100g)	Protein (g/100g)	Total sugar (g/100g)	Sodium (mg/kg)
	sampleA	1	181.03	40.22	0.35	55.1	4.25	29.22	70.1
	sampleA	2	181.05	40.18	0.36	55.17	4.25	28.79	69.27
	sampleA	3	181.07	40.23	0.35	54.98	4.28	29.25	68.72
	sampleB	1	21.67	3.68	0.15	92.03	1.35	0	7816.92
	sampleB	2	21.57	3.7	0.14	92.1	1.33	0	7817.54
	sampleB	3	21.62	3.68	0.15	92.05	1.33	0	7819.44
	sampleC	1	26.33	4.47	0.25	81.44	1.68	0	1827.54
	sampleC	2	26.31	4.45	0.25	81.4	1.68	0	1830.55
	sampleC	3	26.34	4.43	0.25	81.39	1.66	0	1827.61
	sampleD	1	102.38	3.53	2.9	73.45	15.54	0	14053.1
	sampleD	2	103	3.53	2.91	73.5	15.79	0	14054.2
	sampleD	3	102.45	3.64	2.95	73.44	15.5	0	14056.1
	samoleE	1	113.46	7.3	2.06	68.98	16.43	0	15736.4
	samoleE	2	113.5	7.3	2	69.01	16.45	0	15737.5
	samoleE	3	113.47	7.4	2.05	68.95	16.65	0	15740.7

## Sheet: spearman
Spearman's correlations
			ASVs	Richness	Bacilli	Alphaproteobacteria	Gammaproteobacteria	Cyanobacteriia	Halobacteria	Bacteroidia	Fusobacteriia	Actinobacteria	Deinococci	Nanosalinia	Calories	Carbohydrate	Fat	Moisture	Protein	Total sugars	Sodium
	ASVs	Correlation Coefficient	1	.996**	-.565*	0.234138	.941**	0.112601	.714**	.934**	0.297194	.891**	.812**	.766**	-.820**	-0.3638	-.564*	.810**	-.517*	-.700**	0.0500447
		Sig.		1.03359e-14	0.02826	0.400959	1.75247e-07	0.689494	0.00279126	3.39771e-07	0.282054	8.40081e-06	0.000237061	0.000866384	0.000179407	0.182538	0.028446	0.000254426	0.0484267	0.00365808	0.859417
		N	15	15	15	15	15	15	15	15	15	15	15	15	15	15	15	15	15	15	15
	Richness	Correlation Coefficient	.996**	1	-.564*	0.217857	.949**	0.110714	.725**	.936**	0.296929	.892**	.799**	.765**	-.821**	-0.359894	-.569*	.804**	-0.513878	-.694**	0.05
		Sig.	1.03359e-14		0.0284325	0.435393	6.85211e-08	0.694463	0.00222518	2.8317e-07	0.282505	7.93645e-06	0.000347863	0.000881412	0.000173148	0.187632	0.0268091	0.000307265	0.0500518	0.00407349	0.859541
		N	15	15	15	15	15	15	15	15	15	15	15	15	15	15	15	15	15	15	15
	Bacilli	Correlation Coefficient	-.565*	-.564*	1	-.786**	-.627*	-.707**	-0.448632	-.637*	0.272953	-0.502234	-.646**	-.523*	0.492857	-0.112803	.912**	-.514*	.818**	-0.00510576	.536*
		Sig.	0.02826	0.0284325		0.000516455	0.0122989	0.00319548	0.0934746	0.0106878	0.324972	0.0564136	0.00922302	0.0456846	0.061951	0.688963	2.17993e-06	0.0498392	0.000192508	0.985592	0.039567
		N	15	15	15	15	15	15	15	15	15	15	15	15	15	15	15	15	15	15	15
	Alphaproteobacteria	Correlation Coefficient	0.234138	0.217857	-.786**	1	0.244862	.929**	0.0361457	0.267267	-.693**	0.291332	0.433748	0.297927	-0.414286	0.0447629	-.829**	0.467857	-.865**	0.234865	-.621*
		Sig.	0.400959	0.435393	0.000516455		0.379091	5.86794e-07	0.898238	0.33555	0.0041447	0.292108	0.106247	0.280812	0.124715	0.874139	0.000131071	0.0786302	3.16558e-05	0.399455	0.013402
		N	15	15	15	15	15	15	15	15	15	15	15	15	15	15	15	15	15	15	15
	Gammaproteobacteria	Correlation Coefficient	.941**	.949**	-.627*	0.244862	1	0.0840036	.653**	.982**	0.367339	.864**	.785**	.752**	-.774**	-0.297492	-.592*	.786**	-0.472223	-.690**	0.0911529
		Sig.	1.75247e-07	6.85211e-08	0.0122989	0.379091		0.765974	0.00826197	8.42602e-11	0.178	3.27927e-05	0.000522774	0.00121171	0.000709709	0.28155	0.0200447	0.000506474	0.0755093	0.00442438	0.746635
		N	15	15	15	15	15	15	15	15	15	15	15	15	15	15	15	15	15	15	15
	Cyanobacteriia	Correlation Coefficient	0.112601	0.110714	-.707**	.929**	0.0840036	1	0.0574078	0.109418	-.861**	0.201966	0.270029	0.132921	-0.371429	0.00716207	-.756**	0.371429	-.867**	0.349745	-.689**
		Sig.	0.689494	0.694463	0.00319548	5.86794e-07	0.765974		0.838965	0.697883	3.71184e-05	0.470391	0.330387	0.636751	0.17285	0.97979	0.00111538	0.17285	2.91589e-05	0.201297	0.00447373
		N	15	15	15	15	15	15	15	15	15	15	15	15	15	15	15	15	15	15	15
	Halobacteria	Correlation Coefficient	.714**	.725**	-0.448632	0.0361457	.653**	0.0574078	1	.628*	0.222889	.666**	.618*	.693**	-0.461389	-0.266492	-0.317448	0.438001	-0.366693	-0.341963	-0.29767
		Sig.	0.00279126	0.00222518	0.0934746	0.898238	0.00826197	0.838965		0.0121963	0.424595	0.00670468	0.0141311	0.00417151	0.0834219	0.337008	0.248933	0.10248	0.178823	0.212195	0.281247
		N	15	15	15	15	15	15	15	15	15	15	15	15	15	15	15	15	15	15	15
	Bacteroidia	Correlation Coefficient	.934**	.936**	-.637*	0.267267	.982**	0.109418	.628*	1	0.35384	.882**	.786**	.741**	-.777**	-0.290468	-.571*	.773**	-0.485612	-.692**	0.0950682
		Sig.	3.39771e-07	2.8317e-07	0.0106878	0.33555	8.42602e-11	0.697883	0.0121963		0.195708	1.40135e-05	0.000512885	0.00156488	0.00065958	0.293606	0.0262704	0.000724742	0.0664919	0.00422757	0.736102
		N	15	15	15	15	15	15	15	15	15	15	15	15	15	15	15	15	15	15	15
	Fusobacteriia	Correlation Coefficient	0.297194	0.296929	0.272953	-.693**	0.367339	-.861**	0.222889	0.35384	1	0.138445	0.107601	0.217755	0.10328	0.0351355	0.393098	-0.0885253	.603*	-.534*	.598*
		Sig.	0.282054	0.282505	0.324972	0.0041447	0.178	3.71184e-05	0.424595	0.195708		0.622679	0.702687	0.435613	0.714156	0.901069	0.147196	0.753727	0.0173689	0.0403641	0.0186525
		N	15	15	15	15	15	15	15	15	15	15	15	15	15	15	15	15	15	15	15
	Actinobacteria	Correlation Coefficient	.891**	.892**	-0.502234	0.291332	.864**	0.201966	.666**	.882**	0.138445	1	.824**	.748**	-.885**	-.568*	-0.4735	.872**	-.591*	-.690**	0.0125112
		Sig.	8.40081e-06	7.93645e-06	0.0564136	0.292108	3.27927e-05	0.470391	0.00670468	1.40135e-05	0.622679		0.000160907	0.00134881	1.18199e-05	0.0271475	0.0746135	2.23801e-05	0.0204675	0.00442438	0.964703
		N	15	15	15	15	15	15	15	15	15	15	15	15	15	15	15	15	15	15	15
	Deinococci	Correlation Coefficient	.812**	.799**	-.646**	0.433748	.785**	0.270029	.618*	.786**	0.107601	.824**	1	.922**	-.663**	-0.141774	-.651**	.655**	-.659**	-0.341963	-0.293418
		Sig.	0.000237061	0.000347863	0.00922302	0.106247	0.000522774	0.330387	0.0141311	0.000512885	0.702687	0.000160907		9.97424e-07	0.00701539	0.614254	0.00858429	0.00806007	0.00756771	0.212195	0.288506
		N	15	15	15	15	15	15	15	15	15	15	15	15	15	15	15	15	15	15	15
	Nanosalinia	Correlation Coefficient	.766**	.765**	-.523*	0.297927	.752**	0.132921	.693**	.741**	0.217755	.748**	.922**	1	-.532*	-0.050554	-.525*	.527*	-0.503242	-0.294868	-0.325428
		Sig.	0.000866384	0.000881412	0.0456846	0.280812	0.00121171	0.636751	0.00417151	0.00156488	0.435613	0.00134881	9.97424e-07		0.041366	0.857999	0.0443212	0.0434856	0.0558407	0.286018	0.236572
		N	15	15	15	15	15	15	15	15	15	15	15	15	15	15	15	15	15	15	15
	calories	Correlation Coefficient	-.820**	-.821**	0.492857	-0.414286	-.774**	-0.371429	-0.461389	-.777**	0.10328	-.885**	-.663**	-.532*	1	.671**	.583*	-.971**	.689**	.694**	-0.103571
		Sig. (2-tailed)	0.000179407	0.000173148	0.061951	0.124715	0.000709709	0.17285	0.0834219	0.00065958	0.714156	1.18199e-05	0.00701539	0.041366		0.00612618	0.0224054	1.68708e-09	0.00446859	0.00407349	0.71338
		N	15	15	15	15	15	15	15	15	15	15	15	15	15	15	15	15	15	15	15
	carbo	Correlation Coefficient	-0.3638	-0.359894	-0.112803	0.0447629	-0.297492	0.00716207	-0.266492	-0.290468	0.0351355	-.568*	-0.141774	-0.050554	.671**	1	-0.102611	-.682**	0.201975	.701**	-0.383171
		Sig. (2-tailed)	0.182538	0.187632	0.688963	0.874139	0.28155	0.97979	0.337008	0.293606	0.901069	0.0271475	0.614254	0.857999	0.00612618		0.715936	0.00508236	0.470372	0.00357173	0.158609
		N	15	15	15	15	15	15	15	15	15	15	15	15	15	15	15	15	15	15	15
	fat	Correlation Coefficient	-.564*	-.569*	.912**	-.829**	-.592*	-.756**	-0.317448	-.571*	0.393098	-0.4735	-.651**	-.525*	.583*	-0.102611	1	-.589*	.868**	-0.00770001	0.488337
		Sig. (2-tailed)	0.028446	0.0268091	2.17993e-06	0.000131071	0.0200447	0.00111538	0.248933	0.0262704	0.147196	0.0746135	0.00858429	0.0443212	0.0224054	0.715936		0.0209049	2.77335e-05	0.978272	0.0647565
		N	15	15	15	15	15	15	15	15	15	15	15	15	15	15	15	15	15	15	15
	mois	Correlation Coefficient	.810**	.804**	-.514*	0.467857	.786**	0.371429	0.438001	.773**	-0.0885253	.872**	.655**	.527*	-.971**	-.682**	-.589*	1	-.679**	-.699**	0.0928571
		Sig. (2-tailed)	0.000254426	0.000307265	0.0498392	0.0786302	0.000506474	0.17285	0.10248	0.000724742	0.753727	2.23801e-05	0.00806007	0.0434856	1.68708e-09	0.00508236	0.0209049		0.00541329	0.00370169	0.742045
		N	15	15	15	15	15	15	15	15	15	15	15	15	15	15	15	15	15	15	15
	prot	Correlation Coefficient	-.517*	-0.513878	.818**	-.865**	-0.472223	-.867**	-0.366693	-0.485612	.603*	-.591*	-.659**	-0.503242	.689**	0.201975	.868**	-.679**	1	0.00767924	.573*
		Sig. (2-tailed)	0.0484267	0.0500518	0.000192508	3.16558e-05	0.0755093	2.91589e-05	0.178823	0.0664919	0.0173689	0.0204675	0.00756771	0.0558407	0.00446859	0.470372	2.77335e-05	0.00541329		0.978331	0.0255736
		N	15	15	15	15	15	15	15	15	15	15	15	15	15	15	15	15	15	15	15
	sugar	Correlation Coefficient	-.700**	-.694**	-0.00510576	0.234865	-.690**	0.349745	-0.341963	-.692**	-.534*	-.690**	-0.341963	-0.294868	.694**	.701**	-0.00770001	-.699**	0.00767924	1	-.694**
		Sig. (2-tailed)	0.00365808	0.00407349	0.985592	0.399455	0.00442438	0.201297	0.212195	0.00422757	0.0403641	0.00442438	0.212195	0.286018	0.00407349	0.00357173	0.978272	0.00370169	0.978331		0.00407349
		N	15	15	15	15	15	15	15	15	15	15	15	15	15	15	15	15	15	15	15
	sodium	Correlation Coefficient	0.0500447	0.05	.536*	-.621*	0.0911529	-.689**	-0.29767	0.0950682	.598*	0.0125112	-0.293418	-0.325428	-0.103571	-0.383171	0.488337	0.0928571	.573*	-.694**	1
		Sig. (2-tailed)	0.859417	0.859541	0.039567	0.013402	0.746635	0.00447373	0.281247	0.736102	0.0186525	0.964703	0.288506	0.236572	0.71338	0.158609	0.0647565	0.742045	0.0255736	0.00407349
		N	15	15	15	15	15	15	15	15	15	15	15	15	15	15	15	15	15	15	15
** Correlation is significant at the 0.01 level.
* Correlation is significant at the 0.05 level.

## Sheet: diverisity
sample	replicate	chao1	dominance	goods_coverage	observed_features	pielou_e	shannon	simpson
sampleA	1	36	0.395	1	33	0.337	1.702	0.605
sampleA	2	34.25	0.361	1	34	0.364	1.852	0.639
sampleA	3	26	0.293	1	26	0.445	2.093	0.707
sampleB	1	263.067	0.14	0.999	236	0.524	4.134	0.86
sampleB	2	347.775	0.116	0.999	312	0.506	4.193	0.884
sampleB	3	245.677	0.136	1	236	0.515	4.059	0.864
sampleC	1	2067.23	0.029	0.995	1938	0.708	7.734	0.971
sampleC	2	1752.15	0.041	0.996	1649	0.676	7.228	0.959
sampleC	3	1819.02	0.026	0.996	1721	0.722	7.762	0.974
sampleD	1	155.75	0.176	1	152	0.482	3.492	0.824
sampleD	2	119.071	0.158	1	118	0.513	3.533	0.842
sampleD	3	114.333	0.161	1	114	0.514	3.51	0.839
samoleE	1	171.143	0.115	1	154	0.562	4.086	0.885
samoleE	2	138.833	0.106	1	138	0.585	4.156	0.894
samoleE	3	141.8	0.104	1	139	0.593	4.223	0.896

## Sheet: top 10 classes
sample	replicate	Bacilli	Alphaproteobacteria	Gammaproteobacteria	Cyanobacteriia	Halobacteria	Bacteroidia	Fusobacteriia	Actinobacteria	Deinococci	Nanosalinia	Others		sample	class
sampleA	1	49.2749	4.35644	0.177275	4.37341	0	0	0	0.0018859	0	0	41.8161		Bacilli
sampleA	2	48.4111	6.94012	0.141443	6.74776	0	0	0	0	0	0	37.7595		Alphaproteobacteria
sampleA	3	38.8326	12.1716	0.141443	11.4814	0	0	0	0	0	0	37.3729		Gammaproteobacteria
sampleB	1	8.09052	34.2254	24.6676	31.8039	0.0018859	0.284771	0	0.880717	0	0	0.0452617		Cyanobacteriia
sampleB	2	9.67468	40.1942	23.9359	24.3979	0	0.160302	0	1.471	0.00565771	0.0018859	0.158416		Halobacteria
sampleB	3	8.57331	35.7793	23.4682	30.4517	0	0.160302	0	1.53324	0.0018859	0	0.0320603		Bacteroidia
sampleC	1	9.06554	5.2975	31.5191	3.4116	24.6016	14.9005	0.0301744	3.49646	1.31825	0.765677	5.59359		Fusobacteriia
sampleC	2	8.92786	5.10514	34.3215	3.13626	18.7478	18.4253	0.039604	3.45686	1.46346	1.22772	5.14851		Actinobacteria
sampleC	3	8.25271	5.11457	30.1556	3.15889	28.8826	14.0651	0.0358322	3.30599	1.39745	0.761905	4.8694		Deinococci
sampleD	1	90.7628	0.12447	7.97548	0.833569	0.00754361	0.0339463	0.0150872	0.0942951	0	0	0.152758		Nanosalinia
sampleD	2	88.8053	0.475248	8.68835	1.54644	0	0.058463	0.0169731	0.137671	0	0	0.27157		Others
sampleD	3	89.8312	0.473362	7.28713	2.04055	0	0.0678925	0.0132013	0.145215	0	0	0.141443
samoleE	1	73.1636	0.226308	21.356	0.226308	0	0.11504	2.79491	0.0905233	0	0	2.02735
samoleE	2	72.1358	0.233852	22.0424	0.205563	0	0.0905233	3.51155	0.0641207	0	0	1.71617
samoleE	3	75.3871	0.190476	19.7115	0.220651	0	0.0792079	2.39321	0.0810938	0	0	1.93682

## Sheet: top 10 phyla
Firmicutes	8.79-89.81
Proteobacteria	7.97-60.75
Cyanobacteria	0.21-28.88
Halobacterota	0.00-24.07
Bacteroidota	0.00-17.00
Actinobacteriota	0.08-3.59
Fusobacteriota	0.00-2.89
Deinococcota	0.00-1.39
Nanohaloarchaeota	0.00-0.91
Campylobacterota	0.00-0.75
Others
